# Supplementary material
Source: PubMed Central journal article supplement (PMC3350761)
Supplement: NIHMS350546-supplement-01.pdf [file NIHMS350546-supplement-01.pdf]

## Amphiphilic Adsorption of Human Islet Amyloid Polypeptide Aggregates to Lipid/Aqueous Interfaces

Dequan Xiao<sup>†</sup>, Li Fu<sup>†</sup>, Jian Liu, Victor S. Batista<sup>\*</sup>, and Elsa C. Y. Yan<sup>\*</sup>

Department of Chemistry, Yale University, 225 Prospect Street, New Haven, CT 06520

<sup>†</sup> Equal contribution.

<sup>\*</sup> To whom corresponding should be addressed. E-mail: victor.batista@yale.edu, elsa.yan@yale.edu

### I. Euler transformation matrix.

$$R = \begin{pmatrix} \cos(\phi)\cos(\theta)\cos(\psi) - \sin(\phi)\sin(\psi) & \cos(\phi)\cos(\theta)\sin(\psi) + \sin(\phi)\cos(\psi) & -\cos(\phi)\sin(\theta) \\ -\sin(\phi)\cos(\theta)\cos(\psi) - \cos(\phi)\sin(\psi) & -\sin(\phi)\cos(\theta)\sin(\psi) + \cos(\phi)\cos(\psi) & \sin(\phi)\sin(\theta) \\ \sin(\theta)\cos(\psi) & \sin(\theta)\sin(\psi) & \cos(\theta) \end{pmatrix} \quad (\text{S1})$$

### II. The chiral and achiral susceptibility elements.

$\chi_{zyx}^{(2)}$  and  $\chi_{xyz}^{(2)}$  can be obtained by an integration of the in plane rotation angle  $\phi$  from 0 to  $2\pi$  as discussed in Simpson *et al.* to yield (1)

$$\chi_{zyx}^{(2)} = -\chi_{zxy}^{(2)} = -\frac{1}{2}N_S \times \left\{ \begin{aligned} & \langle \cos^2 \theta \rangle (\beta_{cab} - \beta_{cba}) \\ & + \langle \sin^2 \theta \sin^2 \psi \rangle (\beta_{bca} - \beta_{bac}) \\ & + \langle \sin^2 \theta \cos^2 \psi \rangle (\beta_{abc} - \beta_{acb}) \\ & + \langle \sin^2 \theta \sin \psi \cos \psi \rangle (\beta_{aac} - \beta_{aca} - \beta_{bbc} + \beta_{bcb}) \\ & + \langle \sin \theta \cos \theta \sin \psi \rangle (\beta_{bab} - \beta_{bba} - \beta_{cac} + \beta_{cca}) \\ & + \langle \sin \theta \cos \theta \cos \psi \rangle (-\beta_{aab} + \beta_{aba} - \beta_{cbc} + \beta_{ccb}) \end{aligned} \right\} \quad (\text{S2})$$

$$\chi_{xyz}^{(2)} = \frac{1}{2}N_S \times \left\{ \begin{aligned} & \langle \cos^2 \theta \rangle (\beta_{abc} - \beta_{bac}) \\ & + \langle \sin^2 \theta \sin^2 \psi \rangle (\beta_{cab} - \beta_{acb}) \\ & + \langle \sin^2 \theta \cos^2 \psi \rangle (\beta_{bca} - \beta_{cba}) \\ & + \langle \sin^2 \theta \sin \psi \cos \psi \rangle (\beta_{aca} - \beta_{bcb} - \beta_{caa} + \beta_{cbb}) \\ & + \langle \sin \theta \cos \theta \sin \psi \rangle (\beta_{abb} - \beta_{acc} - \beta_{bab} + \beta_{cac}) \\ & + \langle \sin \theta \cos \theta \cos \psi \rangle (-\beta_{aba} + \beta_{baa} - \beta_{bcc} + \beta_{cbc}) \end{aligned} \right\} \quad (\text{S3})$$

For the *ssp* SFG spectra, the intensity is proportional to the square of  $\chi_{ssp}^{(2)}$ ,

$$\chi_{ssp}^{(2)} = L_{xxz} \chi_{xxz}^{(2)} \quad (\text{S4})$$

where the  $L_{xxz}$  is Fresnel factor, and  $\chi_{xxz}^{(2)}$  is shown as reported by Simpson *et al.* (1),

$$\chi_{xxz}^{(2)} = \frac{1}{2} N_S \times \left\{ \begin{array}{l} \langle \sin^2 \theta \cos \theta \rangle \beta_{ccc} + \langle \cos \theta \rangle (\beta_{aac} - \beta_{bbc}) \\ - \langle \sin^2 \theta \cos \theta \sin^2 \psi \rangle (\beta_{bbc} + \beta_{bcb} + \beta_{cbb}) \\ - \langle \sin^2 \theta \cos \theta \cos^2 \psi \rangle (\beta_{aac} + \beta_{aca} + \beta_{caa}) \\ + \langle \sin^2 \theta \cos \theta \sin \psi \cos \psi \rangle (\beta_{abc} + \beta_{acb} + \beta_{bac} + \beta_{bca} + \beta_{cab} + \beta_{cba}) \\ + \langle \sin \theta \sin \psi \rangle (\beta_{bbb} + \beta_{aab} - \beta_{bcc} - \beta_{cbc}) \\ + \langle \sin \theta \cos \psi \rangle (-\beta_{aaa} - \beta_{bba} + \beta_{acc} + \beta_{cac}) \\ + \langle \sin^3 \theta \sin \psi \rangle (-\beta_{aab} - \beta_{aba} - \beta_{baa} + \beta_{bcc} + \beta_{cbc} + \beta_{ccb}) \\ + \langle \sin^3 \theta \cos \psi \rangle (\beta_{abb} + \beta_{bab} + \beta_{bba} - \beta_{acc} - \beta_{cac} - \beta_{cca}) \\ + \langle \sin^3 \theta \sin^3 \psi \rangle (-\beta_{bbb} + \beta_{aab} + \beta_{aba} + \beta_{baa}) \\ + \langle \sin^3 \theta \cos^3 \psi \rangle (\beta_{aaa} - \beta_{abb} - \beta_{bab} - \beta_{bba}) \end{array} \right. \quad (\text{S5})$$

### III. Amide I normal modes of a tri-peptide pair.

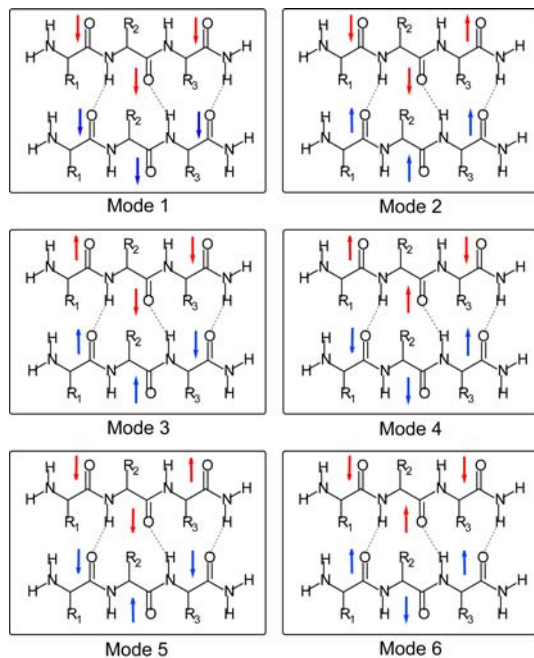

**FIGURE S1.** Vibrational normal modes of the C=O stretch for a typical tri-peptide pair analog.

#### IV. Categorizing the normal modes via the *ab initio* analysis.

To calculate the overall hyperpolarizability of the  $\beta$ -sheet model from the 89 hyperpolarizability tensors (see Section VI for the details of excluding irrelevant normal modes), we need to classify the corresponding normal modes into A and B modes by considering the ideal and non-ideal A and B modes. In ideal cases (see the transition dipole vectors, Fig. S3a), the transition dipole for the A mode is perpendicular to the backbone of  $\beta$ -strands, while that for the B mode is parallel to the backbone of  $\beta$ -strands. However, from the *ab initio* normal mode analysis and also in reality, the transition dipoles for the A and B modes are not perfectly perpendicular and parallel to the  $\beta$ -strands, and thus non-ideal cases need to be considered. In the non-ideal cases, the deviation can come from inhomogeneous magnitudes of dipole derivatives of single C=O groups, the existence of odd number of strongly coupled C=O stretches, and/or the vibrational coupling of C=O stretch to other functional groups.

In our treatment, the deviation is described by  $\xi$  ( $\xi$  has a range of 0-90°), which is defined as the angle between the transition dipole and the backbone of  $\beta$ -strands, i.e.,  $\xi = 0^\circ$  for ideal A mode and  $\xi = 90^\circ$  for ideal B mode.  $\xi$  is estimated to be 68° for the amide I vibration of a single glycine peptide analog. For the ideal case of a tri-peptide analog (Fig. S3b), i.e., assuming that each amide group possesses identical vibrational magnitude and orientation in a coupled normal mode, the A-type mode of a tri-peptide analog (Fig. S3b) shows  $\xi = 40^\circ$ , and the B-type mode of a tri-peptide analog (Fig. S3b) shows  $\xi = 82^\circ$ . Giving some reasonable freedom for  $\xi$  to vary as the amide I vibrations (i.e. magnitude and orientation) of individual C=O groups may differ in a coupled mode and following the convention of defining A and B modes, here we classify all the normal modes from *ab initio* analysis into A-type and B-type modes. The A-type modes are assigned when  $0 \leq \xi < 75^\circ$ , while the B-type modes are assigned when  $75^\circ \leq \xi \leq 90^\circ$ .

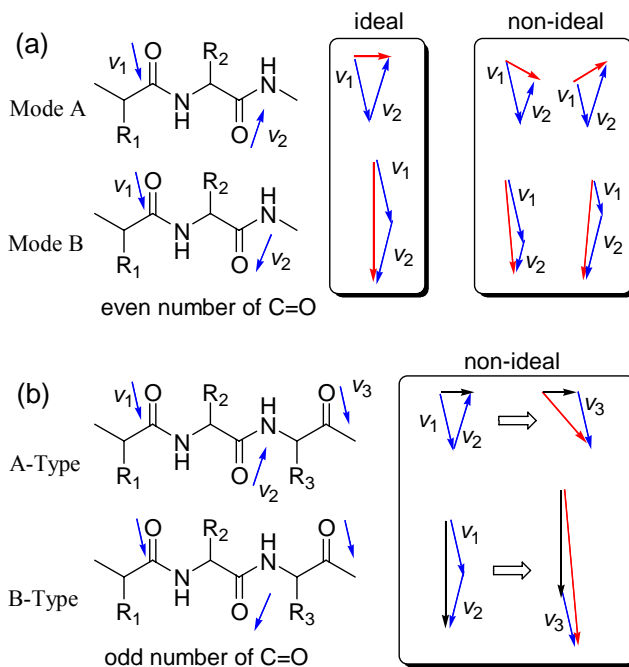

**FIGURE S2.** The ideal and non-ideal A and B vibrational modes in parallel  $\beta$ -sheets.

**V. Normal mode analysis for all the possible tri-peptide pairs in the beta-sheet region of hIAPP aggregates.**

**TABLE S1.** The amide I normal modes of the 16 tripeptide pairs (tpps) used for the simulation of the SFG spectra of the hIAPP aggregates. The vibrational frequencies are shown as the result of the *ab initio* normal mode analyses using the B3LYP/6-31g\* method without any scaling factors for shifting the frequency. The angle  $\zeta$  is defined as the angle between the normal mode dipole derivative and the peptide backbone. The percentage of vibration distributed among the peptide backbone atoms is also shown.

| tpps | Chemical composition | Modes | Backbone vibration (%) | Freq (cm <sup>-1</sup> ) | $\zeta$ (degree) | Type    |
|------|----------------------|-------|------------------------|--------------------------|------------------|---------|
| 1    | Ala8Thr9Gln10        | 211   | 94                     | 1721.65                  | 78               | B       |
|      |                      | 212   | 92                     | 1735.87                  | 89               | B       |
|      |                      | 213   | 95                     | 1746.54                  | 17               | A       |
|      |                      | 215   | 97                     | 1769.47                  | 53               | A       |
|      |                      | 216   | 78                     | 1782.10                  | 58               | deleted |
|      |                      | 218   | 96                     | 1794.17                  | 85               | B       |
| 2    | Thr9Gln10Arg11       | 279   | 27                     | 1722.56                  | 70               | deleted |
|      |                      | 280   | 19                     | 1722.60                  | 87               | deleted |
|      |                      | 281   | 65                     | 1745.37                  | 75               | B       |
|      |                      | 283   | 85                     | 1759.02                  | 82               | B       |
|      |                      | 284   | 97                     | 1777.91                  | 66               | A       |
|      |                      | 286   | 98                     | 1794.12                  | 40               | A       |
| 3    | Gln10Arg11Leu12      | 298   | 59                     | 1718.08                  | 90               | deleted |
|      |                      | 301   | 75                     | 1733.27                  | 88               | B       |
|      |                      | 302   | 40                     | 1743.44                  | 89               | B       |
|      |                      | 303   | 50                     | 1750.22                  | 56               | A       |
|      |                      | 304   | 76                     | 1756.02                  | 62               | A       |
|      |                      | 308   | 87                     | 1774.93                  | 36               | A       |
| 4    | Arg11Leu12Ala13      | 263   | 71                     | 1707.86                  | 84               | B       |
|      |                      | 268   | 87                     | 1733.76                  | 74               | A       |
|      |                      | 269   | 90                     | 1750.05                  | 12               | A       |
|      |                      | 270   | 96                     | 1757.48                  | 82               | B       |
|      |                      | 271   | 98                     | 1780.96                  | 70               | A       |
|      |                      | 272   | 99                     | 1804.08                  | 66               | A       |
| 5    | Leu12Ala13Asn14      | 219   | 90                     | 1731.62                  | 85               | B       |
|      |                      | 220   | 70                     | 1733.86                  | 77               | B       |
|      |                      | 221   | 70                     | 1755.79                  | 72               | deleted |
|      |                      | 222   | 80                     | 1762.64                  | 62               | A       |
|      |                      | 224   | 88                     | 1777.23                  | 64               | A       |
|      |                      | 226   | 99                     | 1794.15                  | 74               | A       |
| 6    | Ala13Asn14Phe15      | 228   | 91                     | 1702.42                  | 70               | A       |
|      |                      | 230   | 93                     | 1741.56                  | 86               | B       |
|      |                      | 231   | 96                     | 1753.55                  | 18               | A       |
|      |                      | 232   | 79                     | 1771.86                  | 63               | A       |
|      |                      | 234   | 76                     | 1787.40                  | 81               | B       |
|      |                      | 236   | 97                     | 1808.26                  | 72               | A       |
| 7    | Asn14Phe15Leu16      | 270   | 71                     | 1706.49                  | 71               | A       |

|    |                 |     |    |         |    |         |
|----|-----------------|-----|----|---------|----|---------|
|    |                 | 272 | 95 | 1733.30 | 79 | B       |
|    |                 | 273 | 93 | 1763.00 | 90 | B       |
|    |                 | 274 | 82 | 1766.75 | 59 | A       |
|    |                 | 276 | 91 | 1779.10 | 28 | A       |
|    |                 | 278 | 98 | 1799.86 | 76 | B       |
| 8  | Phe15Leu16Val17 | 279 | 94 | 1727.13 | 85 | B       |
|    |                 | 280 | 97 | 1732.03 | 69 | A       |
|    |                 | 281 | 96 | 1752.63 | 88 | B       |
|    |                 | 282 | 84 | 1767.98 | 62 | A       |
|    |                 | 283 | 96 | 1771.20 | 76 | B       |
|    |                 | 284 | 99 | 1796.22 | 77 | B       |
| 9  | Ser28Ser29Thr30 | 189 | 93 | 1725.02 | 65 | A       |
|    |                 | 190 | 95 | 1728.08 | 79 | B       |
|    |                 | 191 | 97 | 1753.90 | 73 | A       |
|    |                 | 192 | 88 | 1766.67 | 73 | A       |
|    |                 | 193 | 99 | 1780.89 | 65 | A       |
|    |                 | 194 | 99 | 1795.57 | 79 | B       |
| 10 | Ser29Thr30Asn31 | 203 | 66 | 1715.90 | 77 | B       |
|    |                 | 204 | 91 | 1722.53 | 74 | A       |
|    |                 | 205 | 88 | 1756.03 | 82 | B       |
|    |                 | 206 | 80 | 1768.61 | 64 | A       |
|    |                 | 207 | 93 | 1769.49 | 66 | A       |
|    |                 | 208 | 57 | 1775.70 | 64 | A       |
| 11 | Thr30Asn31Val32 | 225 | 96 | 1713.38 | 84 | B       |
|    |                 | 226 | 72 | 1732.90 | 69 | A       |
|    |                 | 227 | 97 | 1761.33 | 24 | A       |
|    |                 | 228 | 97 | 1762.78 | 74 | A       |
|    |                 | 229 | 97 | 1776.27 | 52 | A       |
|    |                 | 231 | 87 | 1800.78 | 90 | B       |
| 12 | Asn31Val32Gly33 | 191 | 95 | 1716.06 | 79 | B       |
|    |                 | 192 | 97 | 1730.61 | 71 | A       |
|    |                 | 193 | 97 | 1764.02 | 48 | A       |
|    |                 | 194 | 97 | 1769.64 | 82 | B       |
|    |                 | 195 | 99 | 1784.09 | 76 | B       |
|    |                 | 198 | 93 | 1803.40 | 72 | A       |
| 13 | Val32Gly33Ser34 | 177 | 96 | 1732.28 | 87 | B       |
|    |                 | 178 | 98 | 1736.43 | 61 | A       |
|    |                 | 179 | 97 | 1758.88 | 78 | B       |
|    |                 | 180 | 83 | 1764.60 | 70 | A       |
|    |                 | 181 | 99 | 1785.79 | 65 | A       |
|    |                 | 182 | 99 | 1797.32 | 49 | A       |
| 14 | Gly33Ser34Asn35 | 169 | 94 | 1737.26 | 75 | B       |
|    |                 | 170 | 77 | 1746.35 | 83 | B       |
|    |                 | 171 | 79 | 1754.69 | 78 | B       |
|    |                 | 172 | 87 | 1759.86 | 41 | A       |
|    |                 | 173 | 60 | 1770.27 | 60 | A       |
|    |                 | 174 | 66 | 1778.17 | 82 | Deleted |
| 15 | Ser34Asn35Thr36 | 202 | 89 | 1703.10 | 80 | B       |
|    |                 | 204 | 87 | 1736.63 | 78 | B       |

|    |                 |     |     |         |    |         |
|----|-----------------|-----|-----|---------|----|---------|
|    |                 | 205 | 95  | 1749.08 | 28 | A       |
|    |                 | 206 | 96  | 1764.08 | 47 | A       |
|    |                 | 207 | 85  | 1778.40 | 56 | A       |
|    |                 | 210 | 97  | 1817.93 | 74 | A       |
| 16 | Asn35Thr36Tyr37 | 255 | 95  | 1720.60 | 73 | A       |
|    |                 | 256 | 67  | 1729.26 | 78 | B       |
|    |                 | 257 | 74  | 1760.09 | 70 | A       |
|    |                 | 259 | 79  | 1769.44 | 28 | A       |
|    |                 | 260 | 64  | 1778.55 | 47 | Deleted |
|    |                 | 262 | 100 | 1805.26 | 73 | A       |

Among these 96 normal modes in Table S1, 7 of them are eliminated (shown as ‘Deleted’) for computing the SFG hyperpolarizability of  $\beta$ -sheets (using Eq. 5) because the C=O stretch is coupled strongly with the carbonyl group in the residues with more than 20% of the vibration amplitudes are distributed on the residues. We expect the residues are flexible in the aqueous environment, so that the lack of macroscopic order of these residues at the interface could diminish the SFG signals of the coupled normal modes. We find that eliminating these 7 modes leads to a better matching between the calculated and experimental SFG spectra. Therefore, we conclude that these 7 modes are artifacts that need to be removed in the calculation, due to the lack of dynamic effect of the residues in the simulation here. Subsequently, 89 normal modes from the 16 tpp’s are used for calculating the overall hyperpolarizability.

## VI. Parallel $\beta$ -Sheet Hyperpolarizability.

The frequency-dependent vibrational hyperpolarizability of the  $\beta$ -sheet is computed from the hyperpolarizabilities components of  $N_q=89$  normal modes, as follows (Fig. S4):

$$\beta_{lmn}(\omega) = \frac{1}{2} \sum_{q=1}^{N_q} g(\omega, \omega_q) \beta_{lmn,q} \quad (\text{S6})$$

where  $g(\omega, \omega_q)$  is a Gaussian function accounting for the broadening of the normal mode  $\omega_q$ .

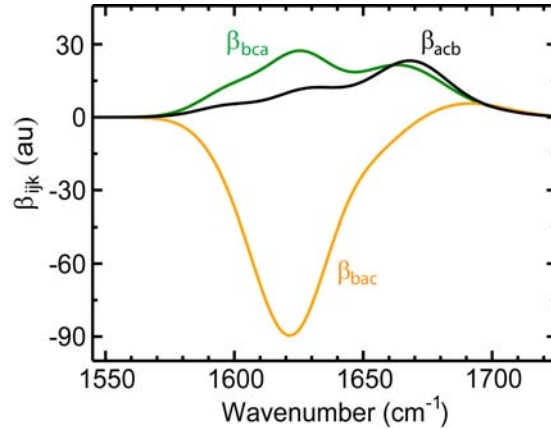

**FIGURE S3.** The calculated spectra of  $\beta_{lmn}$  components:  $\beta_{bca}$ ,  $\beta_{bac}$ , and  $\beta_{acb}$ , where  $\beta_{bca,B}$ ,  $\beta_{bac,B}$ , and  $\beta_{acb,A}$  are taken as the corresponding hyperpolarizability values at the spectral peak positions.

The numerical values of  $\beta_{bca,B}$  and  $\beta_{bac,B}$  (i.e., the maximum and minimum values of  $\beta_{bca}$ , and  $\beta_{bac}$ , respectively, at around  $1622 \text{ cm}^{-1}$  in Fig. S4) and  $\beta_{acb,A}$  (the peak value of  $\beta_{acb}$  at around  $1660 \text{ cm}^{-1}$  in Fig. S4) give the intensity ratios  $\beta_{bca,B}/\beta_{acb,A} = 1.2$  and  $\beta_{bac,B}/\beta_{acb,A} = -3.8$ .

## VII. Solving for the orientation angle $\psi$ directly by the numerical simulation.

The intensity ratio of B mode to A mode  $I_{B/A}$  is calculated numerically by

$$I_{B/A}(\psi) = \frac{\left| \chi_{psp,B}^{(2)}(\psi) \right|^2}{\left| \chi_{psp,A}^{(2)}(\psi) \right|^2} \approx \frac{\left| R(\chi_{psp,B}^{(2)}(\psi)) \right|^2}{\left| R(\chi_{psp,A}^{(2)}(\psi)) \right|^2} \quad (\text{S7})$$

Here,  $R(\chi_{psp,A}^{(2)}(\psi))$  is taken as the peak value around  $1622 \text{ cm}^{-1}$  of the real  $\chi_{psp}^{(2)}(\psi)$  function, and  $R(\chi_{psp,B}^{(2)}(\psi))$  is taken as the peak value around  $1660 \text{ cm}^{-1}$  of the real  $\chi_{psp}^{(2)}(\psi)$  function. The approximation in Eq. S5 is made because the imaginary part of  $\chi_{psp}^{(2)}(\psi)$  is negligibly ( $\sim 10^3$  times) smaller than the real part. For examples, a few  $R(\chi_{psp}^{(2)})$  functions with  $\psi$ -angles labeled are shown in Fig. S4, all the  $R(\chi_{psp}^{(2)})$  functions used ( $0 \leq \psi \leq 360^\circ$ , with an interval of  $5^\circ$ ) are shown in Fig. S5. In Figure S4 or S5, the ratios of  $R(\chi_{psp,B}^{(2)})/R(\chi_{psp,A}^{(2)})$  are shown to vary with the change of  $\psi$ .

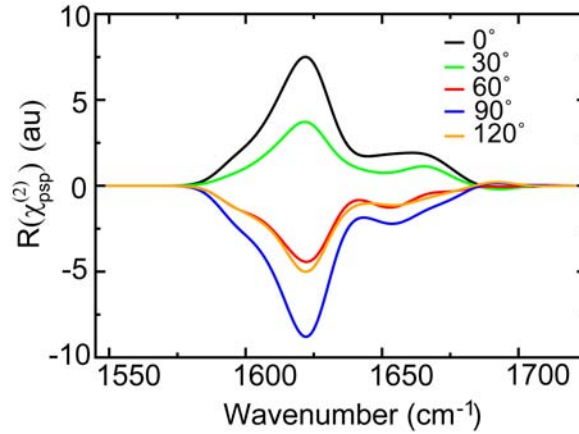

**FIGURE S4.** The real parts of a few  $\chi_{psp}^{(2)}(\psi)$  functions with the  $\psi$ -angles labeled.

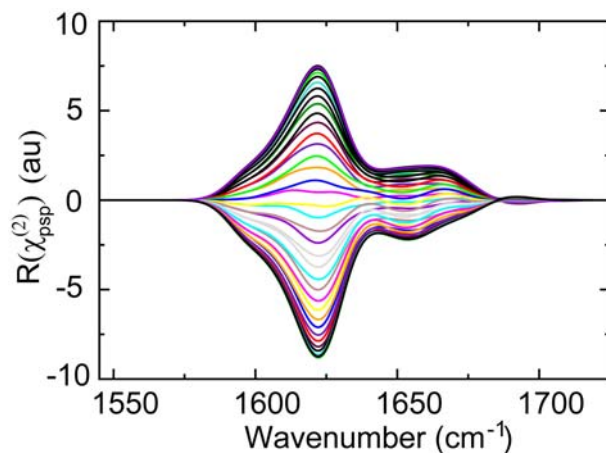

**FIGURE S5.** The real parts of the  $\chi_{psp}^{(2)}(\psi)$  functions for  $\psi = 0-360^\circ$ , with an interval of  $5^\circ$ .

### VIII. Calculated SFG spectra for the 1<sup>st</sup> and 2<sup>nd</sup> $\beta$ -strand

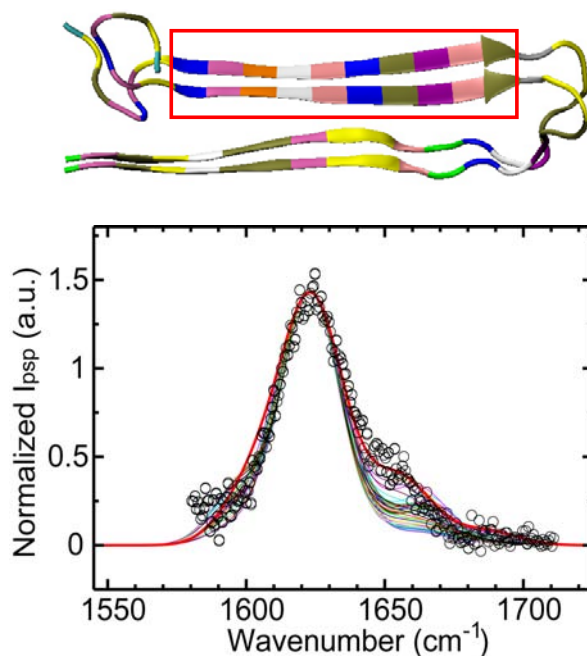

**FIGURE S6.** Calculated psp SFG spectra with different  $\psi$ -angles (every  $5^\circ$  from  $0$  to  $180^\circ$ ) contributed by the first  $\beta$ -sheet region (i.e. the region inside the box of two parallel hIAPP molecules, top panel). The circles are experimentally measured data, and the thick red curve is the calculated SFG spectrum for the 2-strand  $\beta$ -sheet regions with  $\psi=48^\circ$ .



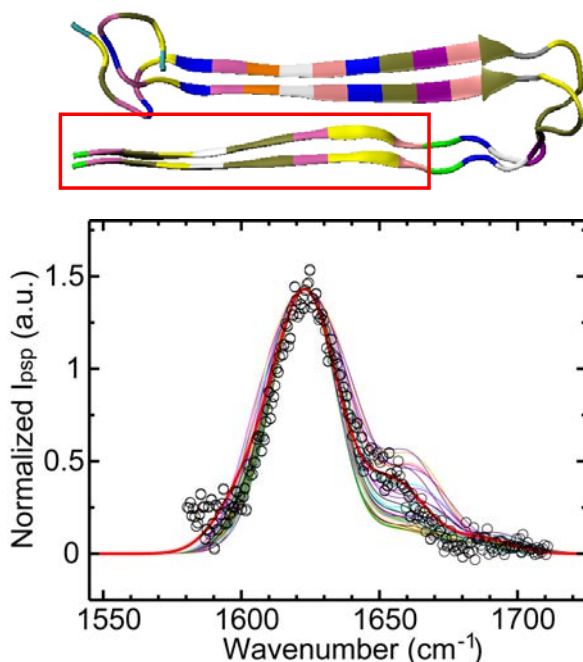

**FIGURE S7.** Calculated psp spectra with different  $\psi$ -angles (every  $5^\circ$  from  $0$  to  $180^\circ$ ) contributed by the 2nd  $\beta$ -sheet region (i.e. the region inside the box of two parallel hIAPP molecules, top panel). The circles are experimentally measured data, and the thick red curve is the calculated SFG spectrum for the 2-strand  $\beta$ -sheet regions with  $\psi=48^\circ$ .

**IX. The dipole derivative vector and polarizability tensors for the used normal modes of tpps 1-16 (see Table S1).**

In the following, the dipole derivative vectors are in the unit of  $[\text{KM/mol}]^{1/2}$ , the polarizability tensors are in the unit of  $\text{\AA}^2/\text{amu}^{1/2}$ .

\*\*\*\*\*

tpps: 1

-----

mode 211, freq = 1721.6492

Dipole derivatives

-3.223380  
6.022440  
27.774568

Polarizability derivatives:

|           |           |          |
|-----------|-----------|----------|
| 0.142082  | -0.285204 | 0.005726 |
| -0.285204 | 0.270548  | 0.326493 |
| 0.005726  | 0.326493  | 0.669965 |

-----

mode 212, freq = 1735.8680

Dipole derivatives

-2.761790  
-0.368535  
16.616677

Polarizability derivatives:  
0.007291 -0.261709 0.186637  
-0.261709 -0.294594 0.325812  
0.186637 0.325812 -0.693755

-----  
mode 213, freq = 1746.5389

Dipole derivatives  
-0.450787  
1.686200  
-0.269101

Polarizability derivatives:  
0.154188 -0.049748 0.048961  
-0.049748 0.466609 -0.140310  
0.048961 -0.140310 0.731476

-----  
mode 215, freq = 1769.4651

Dipole derivatives  
2.371718  
-6.787641  
8.630794

Polarizability derivatives:  
-0.016608 -0.042673 0.031214  
-0.042673 -0.154465 0.182825  
0.031214 0.182825 -0.617527

-----  
mode 216, freq = 1782.1003

Dipole derivatives  
3.533190  
10.767677  
-17.080579

Polarizability derivatives:  
-0.057928 -0.042252 -0.069147  
-0.042252 -0.106922 -0.193261  
-0.069147 -0.193261 1.116565

-----  
mode 218, freq = 1794.1693

Dipole derivatives  
-0.452547  
0.630985  
-8.230743

Polarizability derivatives:  
-0.026320 0.065460 -0.029431  
0.065460 -0.039001 0.022707  
-0.029431 0.022707 0.108837

\*\*\*\*\*

tpps: 2

-----  
mode 281, freq = 1745.3705

Dipole derivatives

-1.342925  
-6.947429  
25.086643

Polarizability derivatives:

|           |           |           |
|-----------|-----------|-----------|
| 0.109254  | -0.061417 | -0.183646 |
| -0.061417 | -0.308480 | 0.222782  |
| -0.183646 | 0.222782  | -1.223822 |

-----  
mode 283, freq = 1759.0164

Dipole derivatives

-0.611593  
0.878604  
6.080262

Polarizability derivatives:

|           |           |          |
|-----------|-----------|----------|
| -0.047017 | -0.006844 | 0.171045 |
| -0.006844 | 0.042362  | 0.215345 |
| 0.171045  | 0.215345  | 0.274255 |

-----  
mode 284, freq = 1777.9148

Dipole derivatives

6.463507  
9.587161  
20.410091

Polarizability derivatives:

|           |           |          |
|-----------|-----------|----------|
| 0.005490  | -0.032526 | 0.176115 |
| -0.032526 | 0.107484  | 0.393030 |
| 0.176115  | 0.393030  | 1.240054 |

-----  
mode 286, freq = 1794.1245

Dipole derivatives

4.021669  
6.658073  
3.769520

Polarizability derivatives:

|          |          |          |
|----------|----------|----------|
| 0.072060 | 0.175271 | 0.114716 |
| 0.175271 | 0.137859 | 0.237736 |
| 0.114716 | 0.237736 | 0.214295 |

\*\*\*\*\*

tpps: 3

-----

mode 301, freq = 1733.2744

Dipole derivatives

-3.967853  
-0.769177  
-26.845367

Polarizability derivatives:

|          |           |           |
|----------|-----------|-----------|
| 0.154438 | 0.375367  | 0.091256  |
| 0.375367 | 0.376855  | -0.073054 |
| 0.091256 | -0.073054 | 1.035345  |

-----  
mode 302, freq = 1743.4389

Dipole derivatives

5.161583  
0.437951  
-22.239016

Polarizability derivatives:

|          |           |           |
|----------|-----------|-----------|
| 0.053353 | 0.107801  | 0.197835  |
| 0.107801 | 0.013658  | -0.371740 |
| 0.197835 | -0.371740 | 0.819319  |

-----  
mode 303, freq = 1750.2200

Dipole derivatives

4.222425  
-7.676803  
-10.626396

Polarizability derivatives:

|          |           |           |
|----------|-----------|-----------|
| 0.185370 | 0.085255  | 0.237851  |
| 0.085255 | -0.124583 | -0.189143 |
| 0.237851 | -0.189143 | -0.616847 |

-----  
mode 304, freq = 1756.0226

Dipole derivatives

-3.178628  
-6.316144  
-11.240339

Polarizability derivatives:

|           |           |           |
|-----------|-----------|-----------|
| -0.165346 | 0.228702  | -0.221718 |
| 0.228702  | -0.116183 | -0.263616 |
| -0.221718 | -0.263616 | -1.019920 |

-----  
mode 308, freq = 1774.9256

Dipole derivatives

-1.520174  
-6.525922

4.552914

Polarizability derivatives:

|           |           |           |
|-----------|-----------|-----------|
| 0.144368  | 0.045007  | -0.165107 |
| 0.045007  | 0.151745  | -0.277694 |
| -0.165107 | -0.277694 | 0.015127  |

\*\*\*\*\*

tpps: 4

-----  
mode 263, freq = 1707.8594

Dipole derivatives

3.826037  
-2.267386  
21.025994

Polarizability derivatives:

|           |           |           |
|-----------|-----------|-----------|
| 0.059055  | -0.119310 | -0.015307 |
| -0.119310 | -0.166684 | 0.280114  |
| -0.015307 | 0.280114  | -0.781009 |

-----  
mode 268, freq = 1733.7631

Dipole derivatives

2.549127  
5.480807  
19.160818

Polarizability derivatives:

|           |           |          |
|-----------|-----------|----------|
| 0.151762  | -0.092633 | 0.219921 |
| -0.092633 | 0.498644  | 0.397757 |
| 0.219921  | 0.397757  | 0.897391 |

-----  
mode 269, freq = 1750.0497

Dipole derivatives

0.438472  
5.961702  
1.261867

Polarizability derivatives:

|          |          |          |
|----------|----------|----------|
| 0.210263 | 0.054215 | 0.154551 |
| 0.054215 | 0.254832 | 0.055381 |
| 0.154551 | 0.055381 | 0.518749 |

-----  
mode 270, freq = 1757.4826

Dipole derivatives

3.693383  
-2.050698  
13.898124

Polarizability derivatives:

|           |           |           |
|-----------|-----------|-----------|
| 0.055252  | -0.036569 | 0.036037  |
| -0.036569 | -0.030103 | 0.234833  |
| 0.036037  | 0.234833  | -0.151147 |

-----  
mode 271, freq = 1780.9556

Dipole derivatives

7.288150  
7.287083  
18.512160

Polarizability derivatives:

|          |          |          |
|----------|----------|----------|
| 0.071588 | 0.074906 | 0.292343 |
| 0.074906 | 0.106265 | 0.214724 |
| 0.292343 | 0.214724 | 1.194345 |

-----  
mode 272, freq = 1804.0779

Dipole derivatives

4.205550  
4.548626  
9.487931

Polarizability derivatives:

|          |          |          |
|----------|----------|----------|
| 0.140705 | 0.063717 | 0.154186 |
| 0.063717 | 0.017269 | 0.157681 |
| 0.154186 | 0.157681 | 0.378958 |

\*\*\*\*\*

tpps: 5

-----  
mode 219, freq = 1731.6213

Dipole derivatives

-9.681366  
-5.429154  
-17.987795

Polarizability derivatives:

|           |           |           |
|-----------|-----------|-----------|
| -0.113365 | 0.010954  | -0.186078 |
| 0.010954  | -0.223173 | -0.443187 |
| -0.186078 | -0.443187 | -0.434374 |

-----  
mode 220, freq = 1733.8624

Dipole derivatives

-6.297865  
3.804177  
-14.795884

Polarizability derivatives:

|          |           |           |
|----------|-----------|-----------|
| 0.128468 | 0.126616  | 0.194343  |
| 0.126616 | 0.329971  | -0.464125 |
| 0.194343 | -0.464125 | 0.937963  |

-----  
mode 222, freq = 1762.6423

Dipole derivatives

-3.788146  
3.825708  
-5.974742

Polarizability derivatives:

|           |           |           |
|-----------|-----------|-----------|
| 0.079353  | -0.011963 | 0.158773  |
| -0.011963 | 0.217616  | -0.295335 |
| 0.158773  | -0.295335 | 0.788832  |

-----  
mode 224, freq = 1777.2253

Dipole derivatives

-8.819697  
9.330798  
-16.888728

Polarizability derivatives:

|           |           |           |
|-----------|-----------|-----------|
| 0.261318  | -0.026711 | 0.390200  |
| -0.026711 | 0.121625  | -0.052267 |
| 0.390200  | -0.052267 | 0.653111  |

-----  
mode 226, freq = 1794.1483

Dipole derivatives

-4.632624  
2.610293  
-7.546519

Polarizability derivatives:

|           |           |           |
|-----------|-----------|-----------|
| 0.085586  | -0.034478 | 0.162354  |
| -0.034478 | -0.025849 | -0.129504 |
| 0.162354  | -0.129504 | 0.364481  |

\*\*\*\*\*

tps: 6

-----  
mode 228, freq = 1702.4219

Dipole derivatives

-11.664925  
7.847741  
-17.540108

Polarizability derivatives:

|          |           |           |
|----------|-----------|-----------|
| 0.321481 | 0.131007  | 0.321808  |
| 0.131007 | 0.208007  | -0.408520 |
| 0.321808 | -0.408520 | 0.758951  |

-----  
mode 230, freq = 1741.5623

Dipole derivatives

-6.375957  
-1.284883  
-18.933144

Polarizability derivatives:

|           |           |           |
|-----------|-----------|-----------|
| -0.058606 | 0.103305  | -0.208181 |
| 0.103305  | -0.262453 | -0.385988 |
| -0.208181 | -0.385988 | -0.376072 |

-----  
mode 231, freq = 1753.5503

Dipole derivatives

1.607893  
7.074316  
-1.552035

Polarizability derivatives:

|           |           |          |
|-----------|-----------|----------|
| 0.104629  | -0.008890 | 0.124753 |
| -0.008890 | 0.423963  | 0.029836 |
| 0.124753  | 0.029836  | 0.772148 |

-----  
mode 232, freq = 1771.8553

Dipole derivatives

-4.859917  
-2.954821  
-3.273494

Polarizability derivatives:

|           |           |           |
|-----------|-----------|-----------|
| -0.116244 | -0.000822 | -0.173854 |
| -0.000822 | -0.185317 | -0.352672 |
| -0.173854 | -0.352672 | -0.455193 |

-----  
mode 234, freq = 1787.4012

Dipole derivatives

-10.835349  
-4.391900  
-25.384218

Polarizability derivatives:

|           |           |           |
|-----------|-----------|-----------|
| -0.347016 | 0.006113  | -0.437000 |
| 0.006113  | -0.082502 | -0.160590 |
| -0.437000 | -0.160590 | -1.271700 |

-----  
mode 236, freq = 1808.2554

Dipole derivatives

-6.385531  
-3.426758  
-8.306175



Polarizability derivatives:

|           |           |           |
|-----------|-----------|-----------|
| -0.272324 | -0.112424 | -0.123455 |
| -0.112424 | 0.025062  | -0.143605 |
| -0.123455 | -0.143605 | -0.329442 |

\*\*\*\*\*

tps: 7

-----  
mode 270, freq = 1706.4888

Dipole derivatives

-7.018350  
5.110254  
-12.967378

Polarizability derivatives:

|          |           |           |
|----------|-----------|-----------|
| 0.436892 | 0.024864  | 0.302638  |
| 0.024864 | 0.350383  | -0.357728 |
| 0.302638 | -0.357728 | 0.596067  |

-----  
mode 272, freq = 1733.3020

Dipole derivatives

-8.050115  
-4.222331  
-21.098791

Polarizability derivatives:

|           |           |           |
|-----------|-----------|-----------|
| -0.039166 | 0.146344  | -0.284358 |
| 0.146344  | -0.174072 | -0.391889 |
| -0.284358 | -0.391889 | -0.694664 |

-----  
mode 273, freq = 1762.9969

Dipole derivatives

-5.936307  
0.071886  
-13.768114

Polarizability derivatives:

|           |           |           |
|-----------|-----------|-----------|
| -0.002749 | -0.029128 | 0.194837  |
| -0.029128 | 0.003029  | -0.243900 |
| 0.194837  | -0.243900 | 0.557495  |

-----  
mode 274, freq = 1766.7541

Dipole derivatives

-2.846871  
6.461099  
-10.258568

Polarizability derivatives:

|          |          |           |
|----------|----------|-----------|
| 0.097955 | 0.010636 | 0.121355  |
| 0.010636 | 0.264618 | -0.369660 |

0.121355 -0.369660 0.907226  
-----  
mode 276, freq = 1779.0977

Dipole derivatives

-2.762973  
-7.317160  
2.723438

Polarizability derivatives:

-0.330509 0.038245 -0.414024  
0.038245 -0.150941 -0.197009  
-0.414024 -0.197009 -1.095909

-----  
mode 278, freq = 1799.8601

Dipole derivatives

-2.665911  
2.612899  
-9.912952

Polarizability derivatives:

-0.048016 -0.014690 0.141566  
-0.014690 -0.001067 -0.137165  
0.141566 -0.137165 0.364571

\*\*\*\*\*

tpps: 8

-----  
mode 279, freq = 1727.1336

Dipole derivatives

-10.488647  
2.413828  
-26.716659

Polarizability derivatives:

0.166344 0.085986 0.182422  
0.085986 -0.002753 -0.445744  
0.182422 -0.445744 0.453638

-----  
mode 280, freq = 1732.0327

Dipole derivatives

-6.220005  
-5.504337  
-12.974683

Polarizability derivatives:

-0.176970 0.065881 -0.350067  
0.065881 -0.445800 -0.248704  
-0.350067 -0.248704 -0.953719

-----  
mode 281, freq = 1752.6326

Dipole derivatives

-2.218693  
0.573372  
-14.538174

Polarizability derivatives:

|           |           |           |
|-----------|-----------|-----------|
| 0.045212  | 0.024379  | -0.003600 |
| 0.024379  | 0.052313  | -0.176493 |
| -0.003600 | -0.176493 | -0.026766 |

-----  
mode 282, freq = 1767.9829

Dipole derivatives

-5.959116  
-6.420077  
-10.614852

Polarizability derivatives:

|           |           |           |
|-----------|-----------|-----------|
| -0.286902 | -0.018943 | -0.148940 |
| -0.018943 | -0.156399 | -0.401703 |
| -0.148940 | -0.401703 | -1.204557 |

-----  
mode 283, freq = 1771.2044

Dipole derivatives

-2.642517  
-3.472519  
-14.120341

Polarizability derivatives:

|           |           |           |
|-----------|-----------|-----------|
| -0.099682 | 0.026419  | -0.284522 |
| 0.026419  | -0.110119 | -0.028152 |
| -0.284522 | -0.028152 | -0.860646 |

-----  
mode 284, freq = 1796.2230

Dipole derivatives

-7.452277  
-2.704909  
-9.018305

Polarizability derivatives:

|           |           |           |
|-----------|-----------|-----------|
| -0.140649 | -0.056369 | -0.271016 |
| -0.056369 | -0.018477 | -0.124147 |
| -0.271016 | -0.124147 | -0.282841 |

\*\*\*\*\*

tpps: 9

-----  
mode 189, freq = 1725.0247

Dipole derivatives

-3.136585

-7.212267  
-15.026292

Polarizability derivatives:

|          |          |          |
|----------|----------|----------|
| 0.221857 | 0.232617 | 0.070367 |
| 0.232617 | 0.626549 | 0.160100 |
| 0.070367 | 0.160100 | 0.935434 |

-----  
mode 190, freq = 1728.0779

Dipole derivatives

-4.061495  
5.478081  
-28.612543

Polarizability derivatives:

|           |           |           |
|-----------|-----------|-----------|
| -0.074893 | 0.346328  | -0.092482 |
| 0.346328  | -0.185930 | 0.366903  |
| -0.092482 | 0.366903  | -0.766344 |

-----  
mode 191, freq = 1753.9034

Dipole derivatives

-1.205536  
2.913700  
-9.170361

Polarizability derivatives:

|           |           |           |
|-----------|-----------|-----------|
| -0.018058 | 0.043732  | -0.040754 |
| 0.043732  | -0.250573 | 0.175354  |
| -0.040754 | 0.175354  | -0.199968 |

-----  
mode 192, freq = 1766.6679

Dipole derivatives

-4.472257  
-3.036573  
-8.985957

Polarizability derivatives:

|          |          |          |
|----------|----------|----------|
| 0.112315 | 0.165833 | 0.239622 |
| 0.165833 | 0.274587 | 0.244855 |
| 0.239622 | 0.244855 | 0.584872 |

-----  
mode 193, freq = 1780.8912

Dipole derivatives

-2.579729  
-9.470803  
-20.618347

Polarizability derivatives:

|          |          |          |
|----------|----------|----------|
| 0.195667 | 0.101178 | 0.165461 |
|----------|----------|----------|

|          |          |          |
|----------|----------|----------|
| 0.101178 | 0.117949 | 0.247329 |
| 0.165461 | 0.247329 | 1.252744 |

-----  
mode 194, freq = 1795.5717

Dipole derivatives

-1.625072  
-1.522485  
-7.633568

Polarizability derivatives:

|           |           |          |
|-----------|-----------|----------|
| -0.013873 | 0.035111  | 0.025174 |
| 0.035111  | -0.001897 | 0.087350 |
| 0.025174  | 0.087350  | 0.267739 |

\*\*\*\*\*

tpps: 10

-----  
mode 203, freq = 1715.9019

Dipole derivatives

0.564232  
3.726988  
-16.163959

Polarizability derivatives:

|           |           |           |
|-----------|-----------|-----------|
| -0.358276 | 0.322612  | -0.171150 |
| 0.322612  | -0.322188 | 0.398419  |
| -0.171150 | 0.398419  | -0.644241 |

-----  
mode 204, freq = 1722.5251

Dipole derivatives

-6.236260  
-6.679524  
-21.948492

Polarizability derivatives:

|          |          |          |
|----------|----------|----------|
| 0.203694 | 0.340635 | 0.127856 |
| 0.340635 | 0.239285 | 0.239091 |
| 0.127856 | 0.239091 | 0.685415 |

-----  
mode 205, freq = 1756.0329

Dipole derivatives

1.458152  
-2.458283  
-16.998258

Polarizability derivatives:

|           |          |           |
|-----------|----------|-----------|
| -0.044561 | 0.167411 | 0.110458  |
| 0.167411  | 0.017520 | 0.214777  |
| 0.110458  | 0.214777 | -0.288660 |

mode 206, freq = 1768.6126

Dipole derivatives

4.074127  
5.128606  
-9.557227

Polarizability derivatives:

|           |           |           |
|-----------|-----------|-----------|
| -0.377753 | 0.114616  | -0.147326 |
| 0.114616  | -0.144001 | 0.061811  |
| -0.147326 | 0.061811  | -1.230777 |

-----  
mode 207, freq = 1769.4931

Dipole derivatives

0.965845  
3.843676  
-8.711611

Polarizability derivatives:

|           |           |           |
|-----------|-----------|-----------|
| -0.068364 | 0.132651  | -0.188336 |
| 0.132651  | -0.374100 | 0.193004  |
| -0.188336 | 0.193004  | -0.691743 |

-----  
mode 208, freq = 1775.6965

Dipole derivatives

-12.383351  
9.044044  
-13.762336

Polarizability derivatives:

|           |           |           |
|-----------|-----------|-----------|
| 0.005785  | -0.055896 | -0.029829 |
| -0.055896 | 0.135778  | -0.013463 |
| -0.029829 | -0.013463 | -0.309996 |

\*\*\*\*\*

tps: 11

-----  
mode 225, freq = 1713.3767

Dipole derivatives

5.324220  
2.605341  
-22.665230

Polarizability derivatives:

|           |           |           |
|-----------|-----------|-----------|
| -0.094667 | 0.233797  | 0.100359  |
| 0.233797  | -0.246723 | 0.215442  |
| 0.100359  | 0.215442  | -0.834893 |

-----  
mode 226, freq = 1732.9042

Dipole derivatives

-1.109512  
-6.967979  
-18.576703

Polarizability derivatives:

|          |          |          |
|----------|----------|----------|
| 0.260177 | 0.345953 | 0.121905 |
| 0.345953 | 0.323266 | 0.446189 |
| 0.121905 | 0.446189 | 0.805055 |

-----  
mode 227, freq = 1761.3301

Dipole derivatives

-1.202636  
-4.800514  
1.789030

Polarizability derivatives:

|           |          |           |
|-----------|----------|-----------|
| 0.070317  | 0.027423 | -0.033558 |
| 0.027423  | 0.322133 | 0.051984  |
| -0.033558 | 0.051984 | 0.421898  |

-----  
mode 228, freq = 1762.7797

Dipole derivatives

2.833102  
-6.757346  
-22.001375

Polarizability derivatives:

|           |          |           |
|-----------|----------|-----------|
| 0.057024  | 0.143125 | -0.065934 |
| 0.143125  | 0.243277 | 0.428688  |
| -0.065934 | 0.428688 | 0.450665  |

-----  
mode 229, freq = 1776.2702

Dipole derivatives

3.426547  
-7.617416  
-9.273353

Polarizability derivatives:

|           |           |           |
|-----------|-----------|-----------|
| 0.072322  | -0.068870 | -0.131964 |
| -0.068870 | -0.006676 | 0.224505  |
| -0.131964 | 0.224505  | 1.139325  |

-----  
mode 231, freq = 1800.7791

Dipole derivatives

-3.780510  
-0.126840  
-15.388804

Polarizability derivatives:

|           |           |          |
|-----------|-----------|----------|
| 0.109330  | -0.132650 | 0.128980 |
| -0.132650 | -0.040986 | 0.155034 |
| 0.128980  | 0.155034  | 0.541241 |

\*\*\*\*\*

tps: 12

-----  
mode 191, freq = 1716.0596

Dipole derivatives

-4.295337  
-3.631233  
18.976904

Polarizability derivatives:

|           |           |           |
|-----------|-----------|-----------|
| 0.147733  | -0.195127 | 0.024851  |
| -0.195127 | 0.468095  | -0.178678 |
| 0.024851  | -0.178678 | 0.863126  |

-----  
mode 192, freq = 1730.6055

Dipole derivatives

-0.522517  
8.345588  
23.828412

Polarizability derivatives:

|           |           |           |
|-----------|-----------|-----------|
| -0.125119 | -0.254758 | 0.072530  |
| -0.254758 | -0.218346 | -0.366959 |
| 0.072530  | -0.366959 | -0.814514 |

-----  
mode 193, freq = 1764.0227

Dipole derivatives

0.399903  
-5.274796  
5.889872

Polarizability derivatives:

|           |           |           |
|-----------|-----------|-----------|
| 0.134324  | -0.048236 | 0.034276  |
| -0.048236 | 0.189828  | -0.072655 |
| 0.034276  | -0.072655 | 0.745486  |

-----  
mode 194, freq = 1769.6421

Dipole derivatives

-1.720960  
2.714228  
18.875052

Polarizability derivatives:

|           |           |           |
|-----------|-----------|-----------|
| -0.102599 | -0.100636 | -0.145995 |
| -0.100636 | 0.037646  | -0.301281 |
| -0.145995 | -0.301281 | 0.242348  |



-----  
mode 195, freq = 1784.0886

Dipole derivatives

-3.757132  
-4.982090  
19.627597

Polarizability derivatives:

|           |           |           |
|-----------|-----------|-----------|
| 0.051479  | 0.049293  | -0.196410 |
| 0.049293  | -0.045202 | -0.063672 |
| -0.196410 | -0.063672 | 1.357887  |

-----  
mode 198, freq = 1803.4044

Dipole derivatives

2.174395  
-4.026322  
12.051699

Polarizability derivatives:

|           |           |           |
|-----------|-----------|-----------|
| -0.033756 | 0.037183  | 0.009293  |
| 0.037183  | 0.041142  | -0.159801 |
| 0.009293  | -0.159801 | 0.462115  |

\*\*\*\*\*

tpps: 13

-----  
mode 177, freq = 1732.2806

Dipole derivatives

-6.791804  
-1.674796  
27.611125

Polarizability derivatives:

|           |           |           |
|-----------|-----------|-----------|
| -0.047038 | -0.123030 | -0.294123 |
| -0.123030 | 0.149156  | -0.358703 |
| -0.294123 | -0.358703 | 0.778671  |

-----  
mode 178, freq = 1736.4341

Dipole derivatives

-1.322573  
8.956164  
15.781953

Polarizability derivatives:

|           |           |           |
|-----------|-----------|-----------|
| -0.205027 | -0.162885 | 0.148405  |
| -0.162885 | -0.416726 | -0.313350 |
| 0.148405  | -0.313350 | -0.975930 |

-----  
mode 179, freq = 1758.8810

Dipole derivatives

-0.522381  
-1.934589  
8.775225

Polarizability derivatives:

|          |           |           |
|----------|-----------|-----------|
| 0.008013 | 0.058967  | 0.035310  |
| 0.058967 | -0.050751 | -0.069267 |
| 0.035310 | -0.069267 | 0.551214  |

-----  
mode 180, freq = 1764.6010

Dipole derivatives

0.357177  
3.174392  
8.638068

Polarizability derivatives:

|           |           |           |
|-----------|-----------|-----------|
| -0.179479 | -0.111958 | -0.090759 |
| -0.111958 | -0.055708 | -0.275755 |
| -0.090759 | -0.275755 | -0.535821 |

-----  
mode 181, freq = 1785.7855

Dipole derivatives

-10.183732  
10.611093  
20.928756

Polarizability derivatives:

|           |           |           |
|-----------|-----------|-----------|
| -0.244601 | 0.056682  | 0.379637  |
| 0.056682  | -0.201717 | -0.424323 |
| 0.379637  | -0.424323 | -1.131804 |

-----  
mode 182, freq = 1797.3155

Dipole derivatives

-0.752738  
2.177311  
-2.411740

Polarizability derivatives:

|           |          |           |
|-----------|----------|-----------|
| 0.016033  | 0.086347 | -0.035985 |
| 0.086347  | 0.044960 | 0.008599  |
| -0.035985 | 0.008599 | 0.294698  |

\*\*\*\*\*

tps: 14

-----  
mode 169, freq = 1737.2624

Dipole derivatives

8.786592  
-7.089788

-24.563800

Polarizability derivatives:

|           |          |           |
|-----------|----------|-----------|
| 0.172097  | 0.118056 | -0.134633 |
| 0.118056  | 0.386269 | 0.481676  |
| -0.134633 | 0.481676 | 0.232428  |

-----  
mode 170, freq = 1746.3538

Dipole derivatives

6.121279  
2.095419  
-16.066421

Polarizability derivatives:

|           |           |           |
|-----------|-----------|-----------|
| -0.039286 | 0.054272  | 0.239762  |
| 0.054272  | -0.464151 | 0.316929  |
| 0.239762  | 0.316929  | -1.286360 |

-----  
mode 171, freq = 1754.6940

Dipole derivatives

5.165506  
-1.181315  
-1.424833

Polarizability derivatives:

|           |           |           |
|-----------|-----------|-----------|
| -0.063822 | -0.004630 | -0.006624 |
| -0.004630 | 0.116068  | 0.080100  |
| -0.006624 | 0.080100  | -0.495992 |

-----  
mode 172, freq = 1759.8559

Dipole derivatives

1.875308  
3.831166  
-2.726046

Polarizability derivatives:

|           |           |           |
|-----------|-----------|-----------|
| -0.143605 | -0.086601 | 0.188487  |
| -0.086601 | -0.091090 | -0.007543 |
| 0.188487  | -0.007543 | -0.899592 |

-----  
mode 173, freq = 1770.2677

Dipole derivatives

4.404028  
-8.714015  
-14.368228

Polarizability derivatives:

|           |           |           |
|-----------|-----------|-----------|
| 0.212885  | -0.088363 | -0.224722 |
| -0.088363 | 0.188951  | 0.254377  |

-0.224722 0.254377 1.190801  
\*\*\*\*\*

tps: 15

-----  
mode 202, freq = 1703.1002

Dipole derivatives

-8.039868  
-3.912058  
20.844316

Polarizability derivatives:

0.137692 -0.178810 -0.164587  
-0.178810 0.085339 -0.203818  
-0.164587 -0.203818 0.818971

-----  
mode 204, freq = 1736.6326

Dipole derivatives

-2.212152  
4.100336  
19.004875

Polarizability derivatives:

-0.154369 -0.131883 0.170951  
-0.131883 -0.404974 -0.308564  
0.170951 -0.308564 -0.186808

-----  
mode 205, freq = 1749.0795

Dipole derivatives

-4.285234  
8.053679  
0.044859

Polarizability derivatives:

-0.288396 -0.013873 0.105793  
-0.013873 -0.497724 -0.104790  
0.105793 -0.104790 -0.807100

-----  
mode 206, freq = 1764.0832

Dipole derivatives

-4.910749  
7.286319  
6.085605

Polarizability derivatives:

-0.146893 0.100253 0.193198  
0.100253 -0.234936 -0.306254  
0.193198 -0.306254 -0.404702

-----  
mode 207, freq = 1778.4005

Dipole derivatives

-1.041311  
5.072931  
7.508160

Polarizability derivatives:

-0.072685 -0.081807 0.200998  
-0.081807 -0.176873 -0.208214  
0.200998 -0.208214 -0.638492

-----  
mode 210, freq = 1817.9292

Dipole derivatives

-6.861310  
4.001284  
12.276700

Polarizability derivatives:

-0.164981 0.108936 0.278178  
0.108936 0.038773 -0.161051  
0.278178 -0.161051 -0.462648

\*\*\*\*\*

tps: 16

-----  
mode 255, freq = 1720.5980

Dipole derivatives

4.380911  
-6.270008  
-20.407248

Polarizability derivatives:

0.136420 0.205532 -0.232334  
0.205532 0.495151 0.461826  
-0.232334 0.461826 0.547951

-----  
mode 256, freq = 1729.2552

Dipole derivatives

5.561231  
2.765731  
-11.432390

Polarizability derivatives:

-0.114251 0.091087 0.113264  
0.091087 -0.156145 0.370603  
0.113264 0.370603 -1.042101

-----  
mode 257, freq = 1760.0892

Dipole derivatives

3.899353

3.030053  
-7.548042

Polarizability derivatives:

|           |           |           |
|-----------|-----------|-----------|
| -0.232450 | -0.007680 | 0.221000  |
| -0.007680 | -0.144846 | 0.064180  |
| 0.221000  | 0.064180  | -1.065311 |

-----  
mode 259, freq = 1769.4399

Dipole derivatives

0.224604  
6.148051  
-3.329265

Polarizability derivatives:

|           |           |           |
|-----------|-----------|-----------|
| -0.146080 | -0.017684 | 0.159117  |
| -0.017684 | -0.220196 | 0.119141  |
| 0.159117  | 0.119141  | -0.992832 |

-----  
mode 262, freq = 1805.2552

Dipole derivatives

3.137904  
3.676814  
-11.969332

Polarizability derivatives:

|           |           |           |
|-----------|-----------|-----------|
| -0.094268 | -0.011871 | 0.111627  |
| -0.011871 | 0.016353  | 0.144723  |
| 0.111627  | 0.144723  | -0.461097 |

## SUPPORTING REFERENCES

1. Moad, A. J., and G. J. Simpson. 2004. A unified treatment of selection rules and symmetry relations for sum-frequency and second harmonic spectroscopies. *J. Phys. Chem. B* 108:3548-3562.
